# Supplementary material for: Longitudinal single-cell multiomic atlas of high-risk neuroblastoma reveals chemotherapy-induced tumor microenvironment rewiring
Source: Springer Nature journal article supplement (doi:10.1038/s41588-025-02158-6), 2025-04-14

**Figure 6a:** Pro-HB-EGF expression in THP1 macrophages

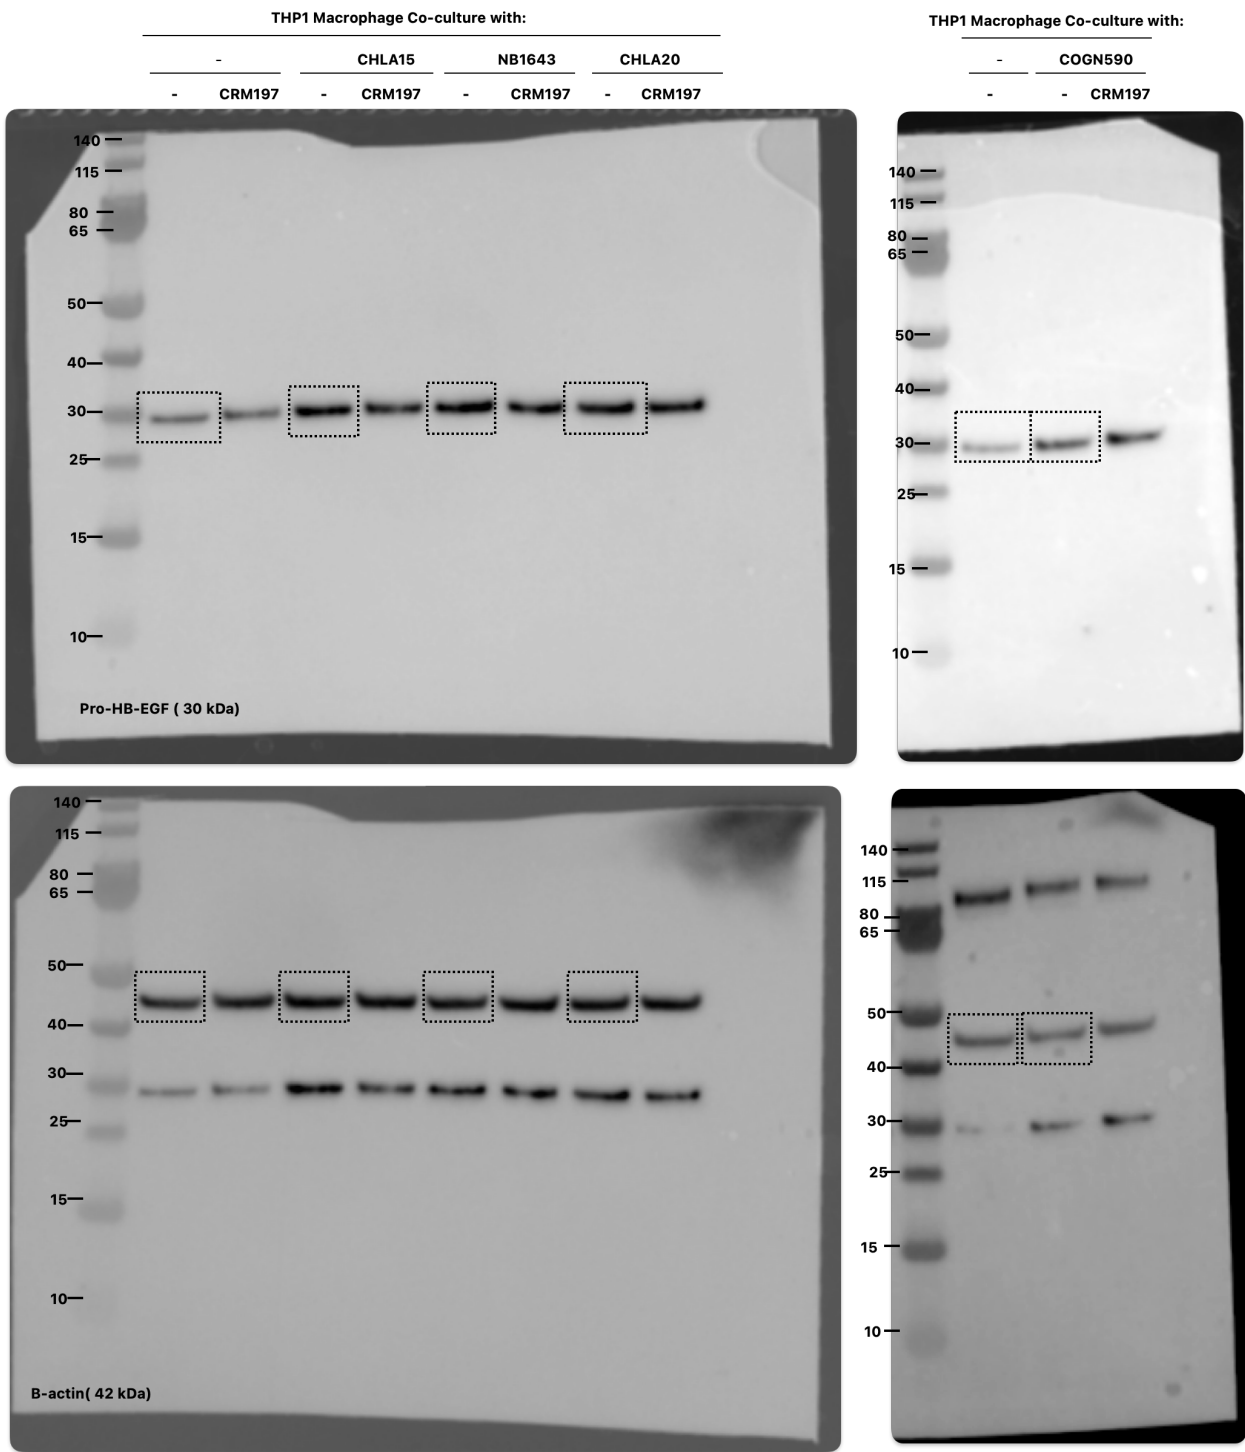

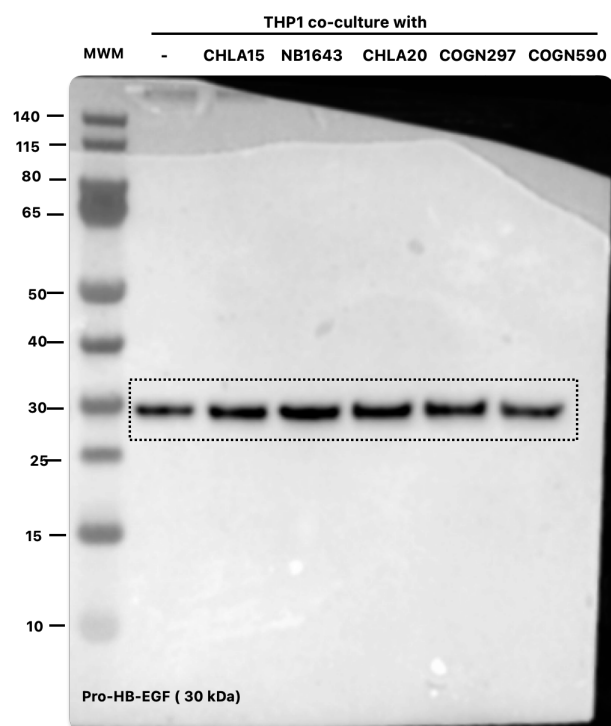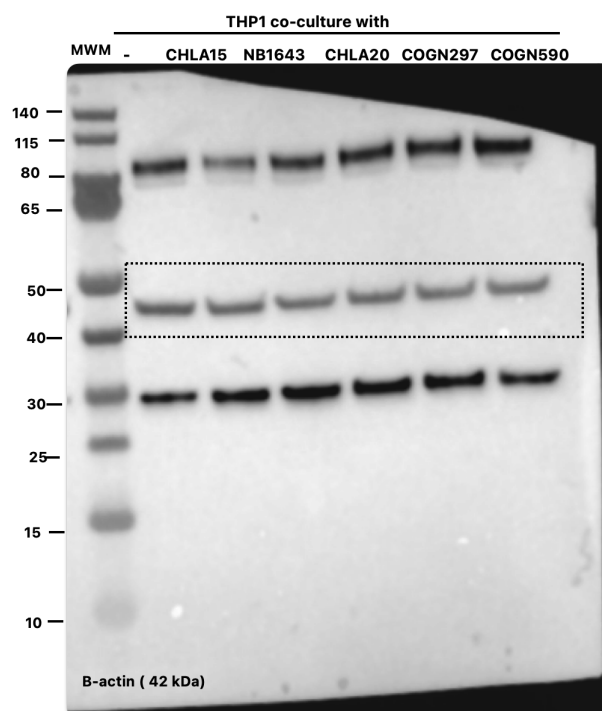

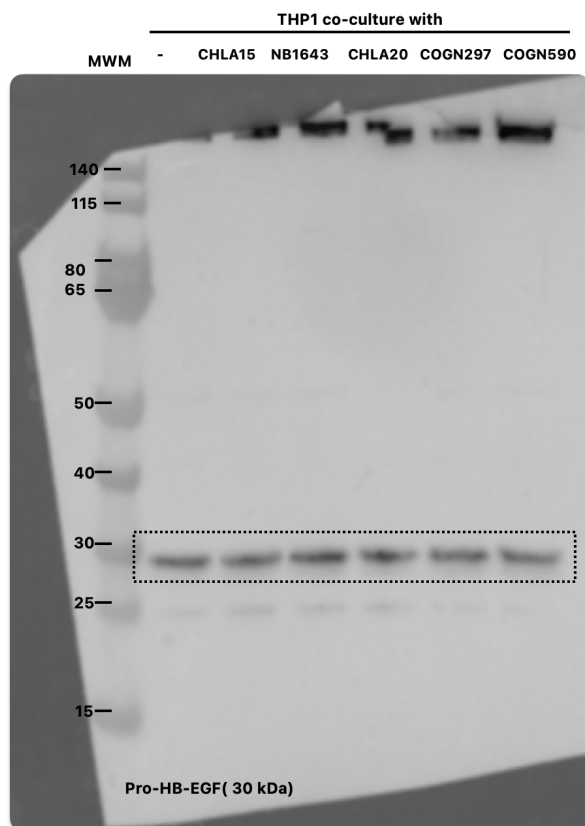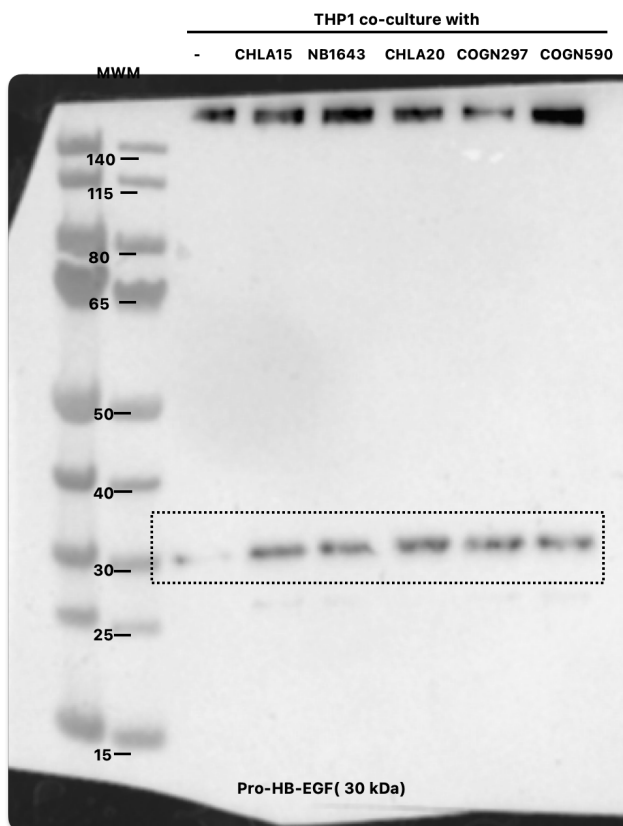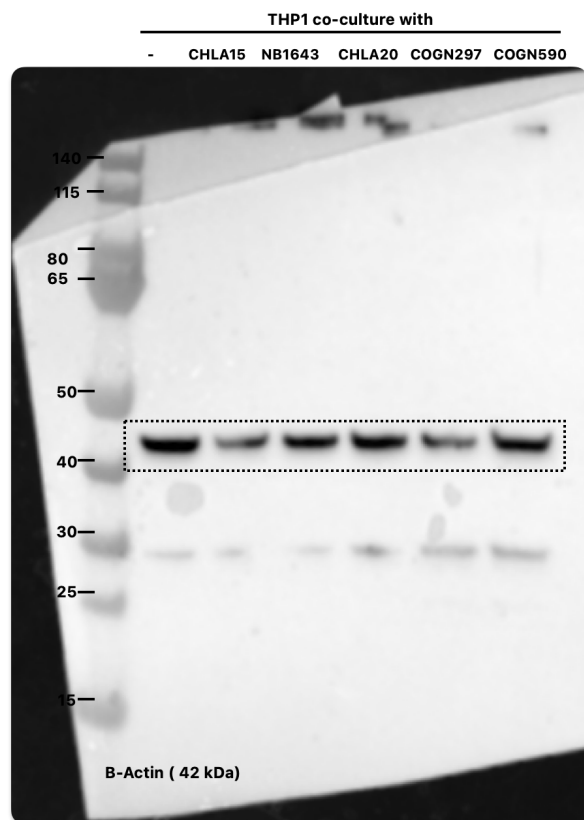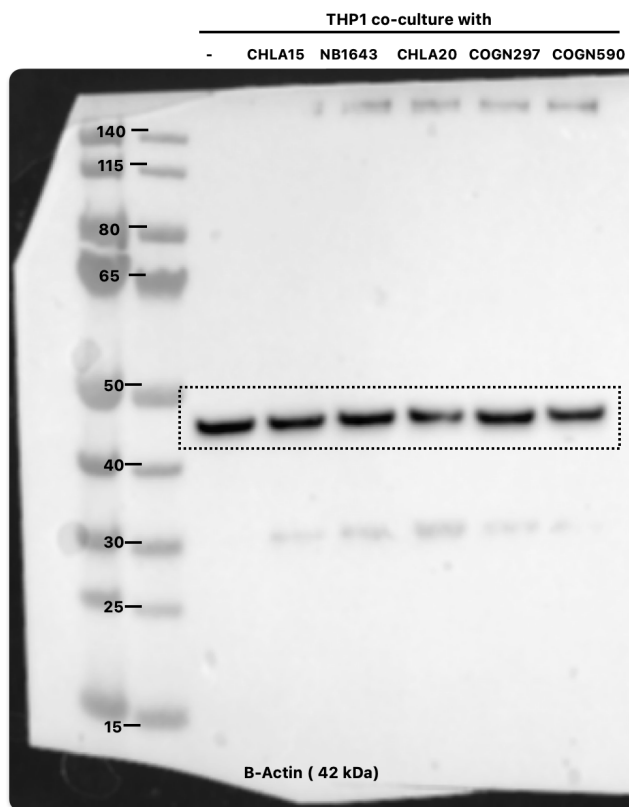

**Figure 6e:** ERK phosphorylation in THP1 macrophage co-cultured NBL cells:

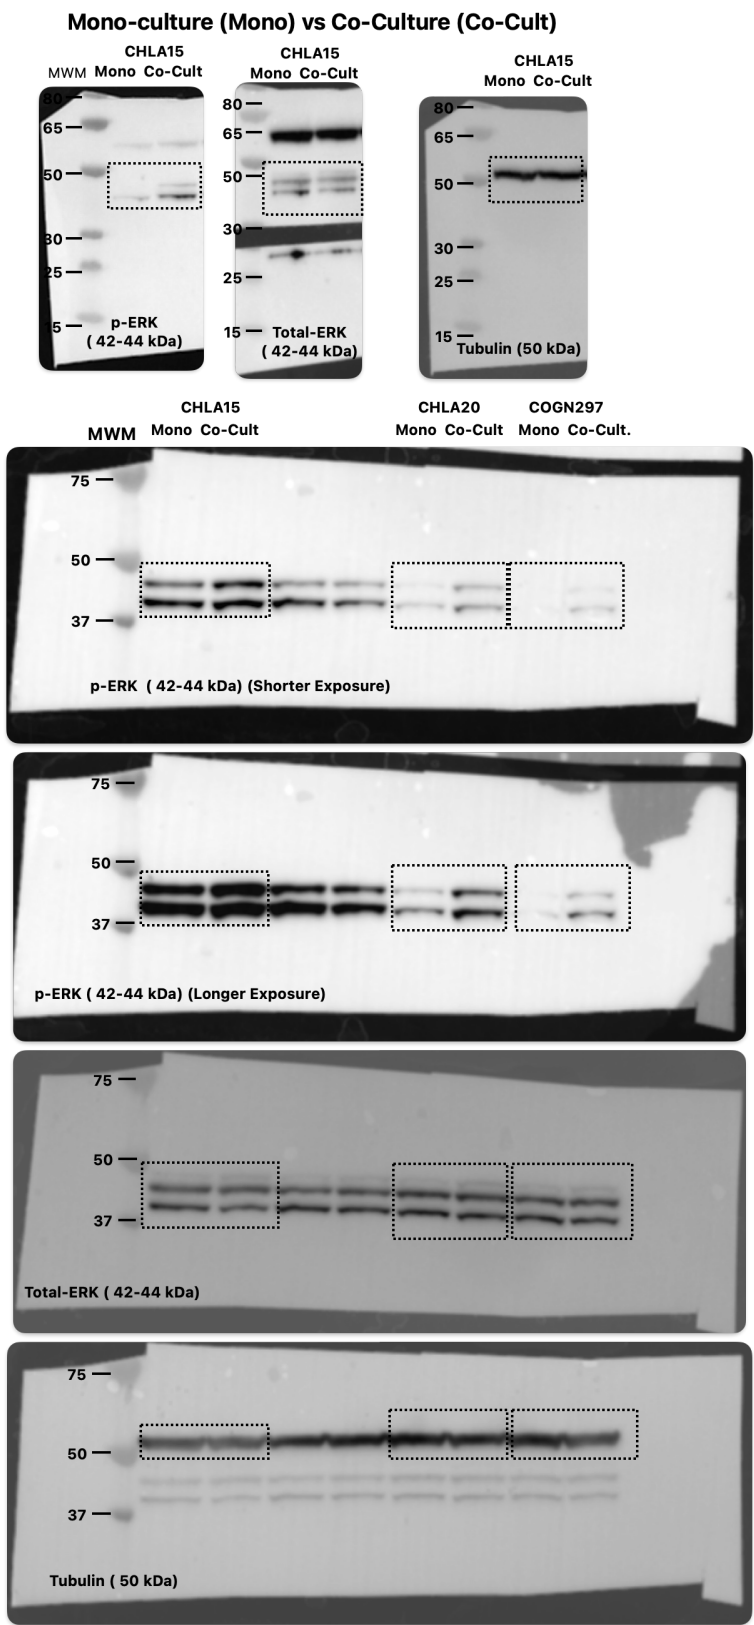



CHLA15

| Co-Cult | Co-Cult +CRM197 |
|---------|-----------------|
|---------|-----------------|

CHLA20

| Co-Cult | Co-Cult +CRM197 |
|---------|-----------------|
|---------|-----------------|

COGN297

| Mono | Co-Cult | Co-Cult +CRM197 |
|------|---------|-----------------|
|------|---------|-----------------|

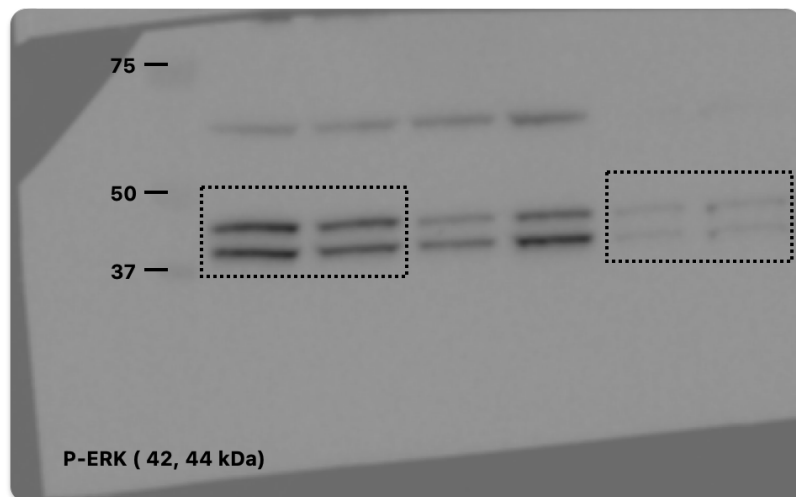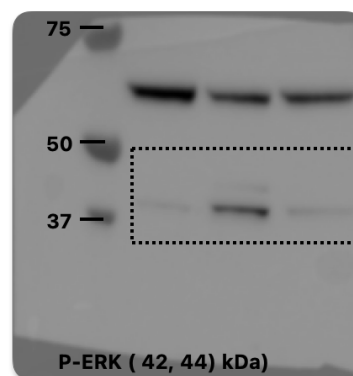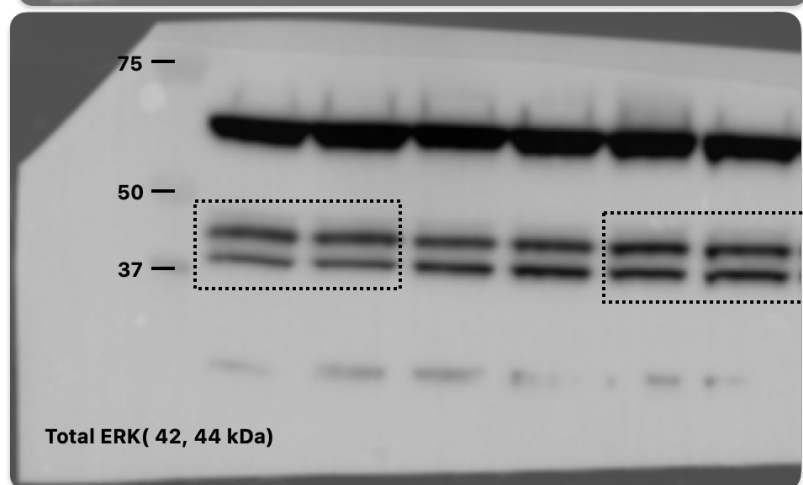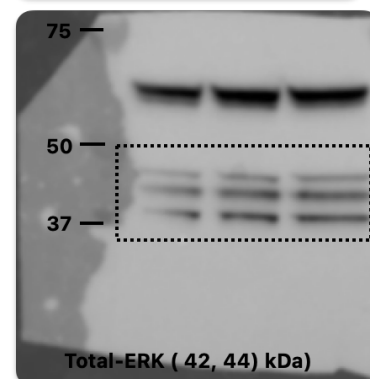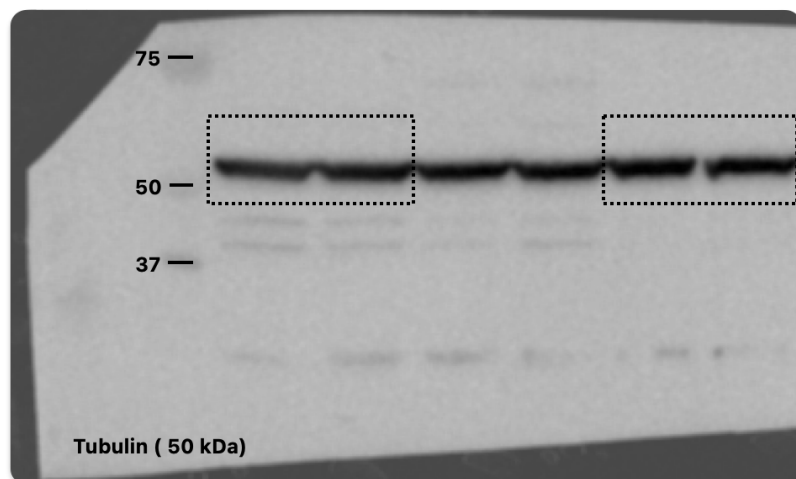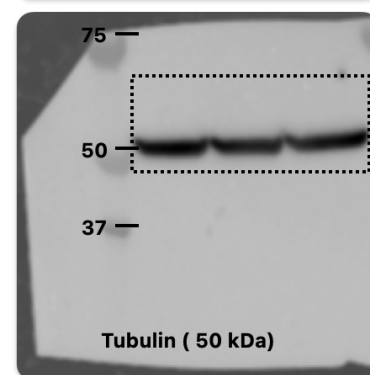

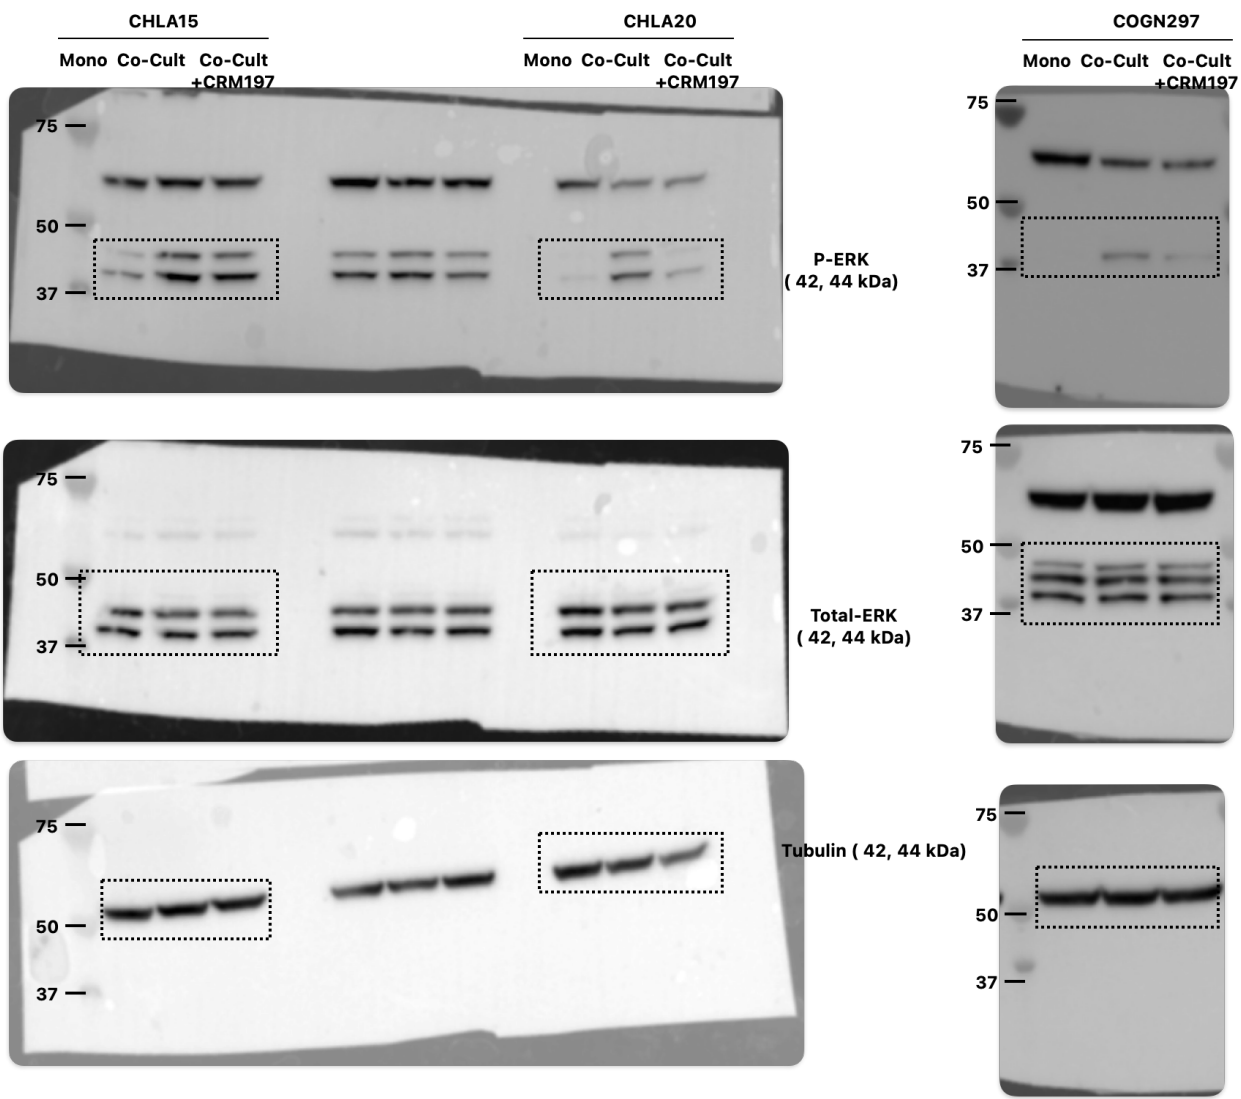

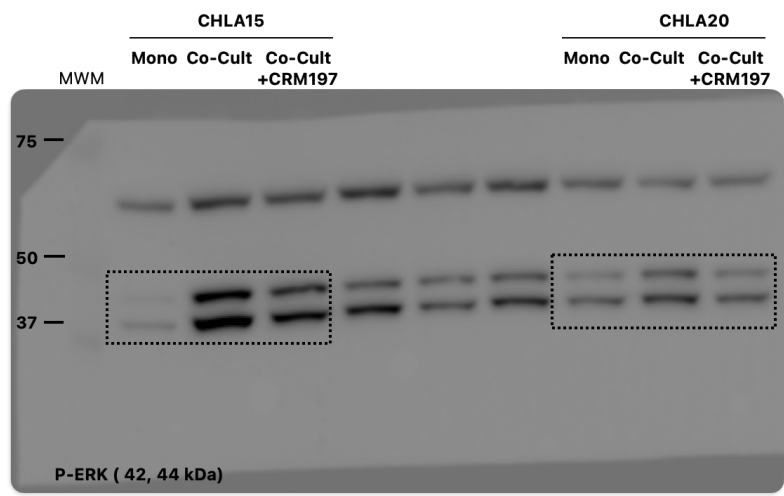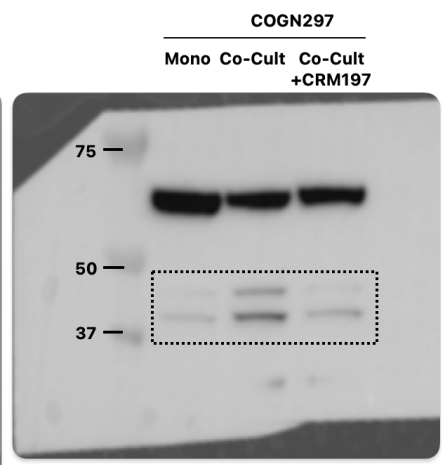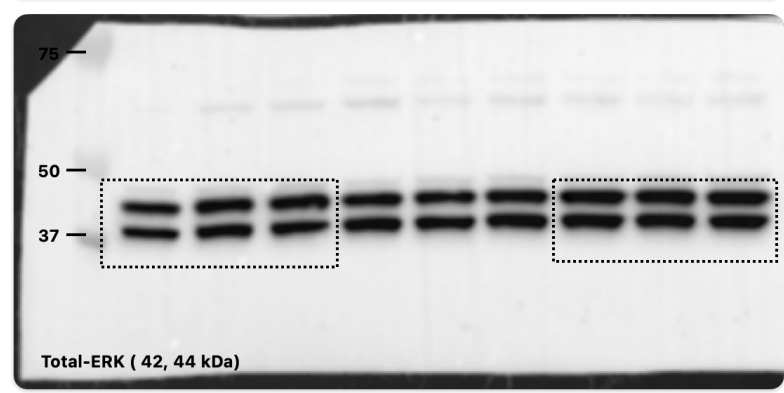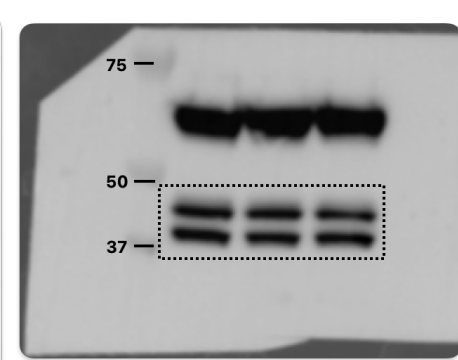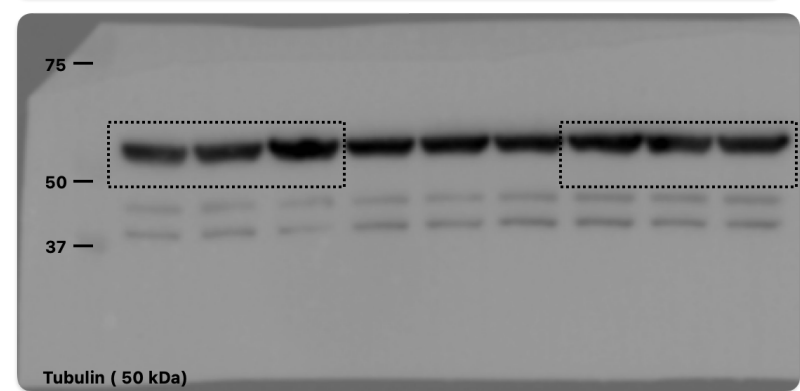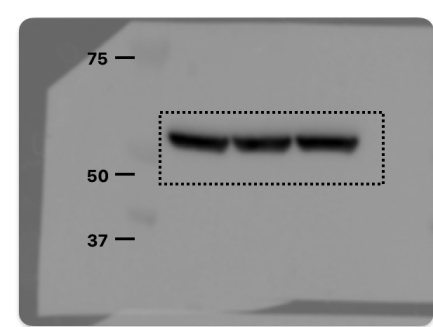

**Figure 6g:** AKT phosphorylation in THP1 macrophage co-cultured NBL cells:

**Mono-culture (Mono) vs Co-Culture (Co-Cult)**

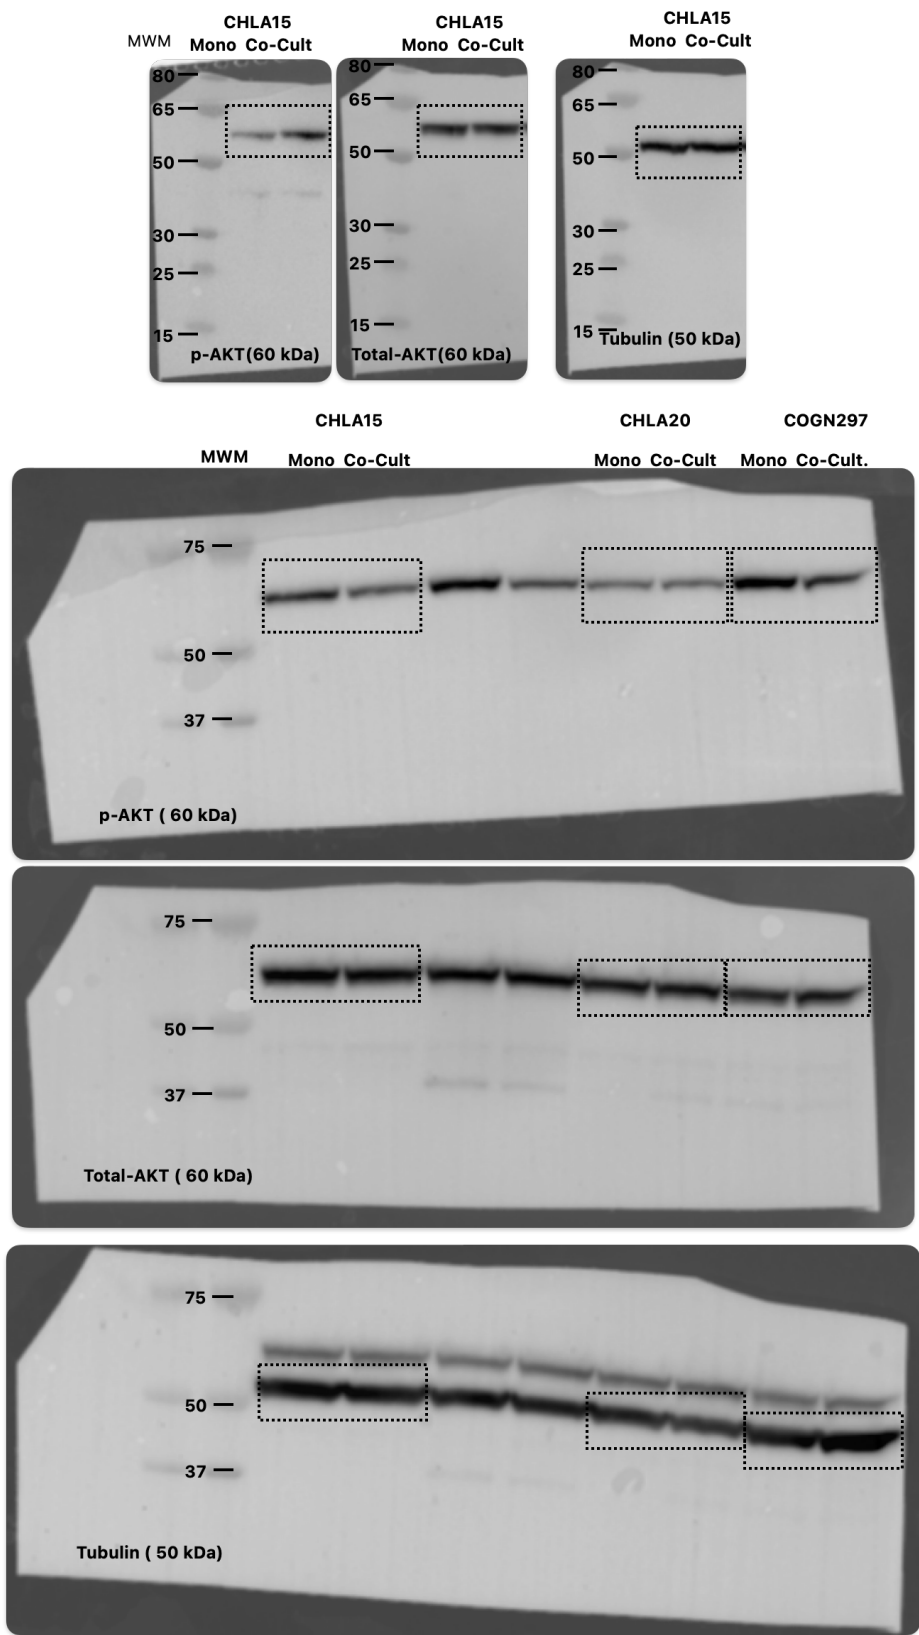

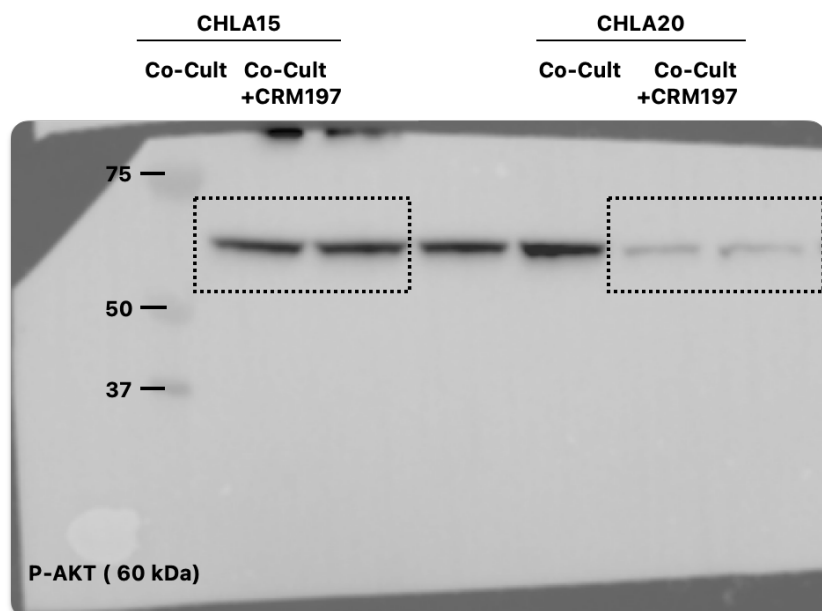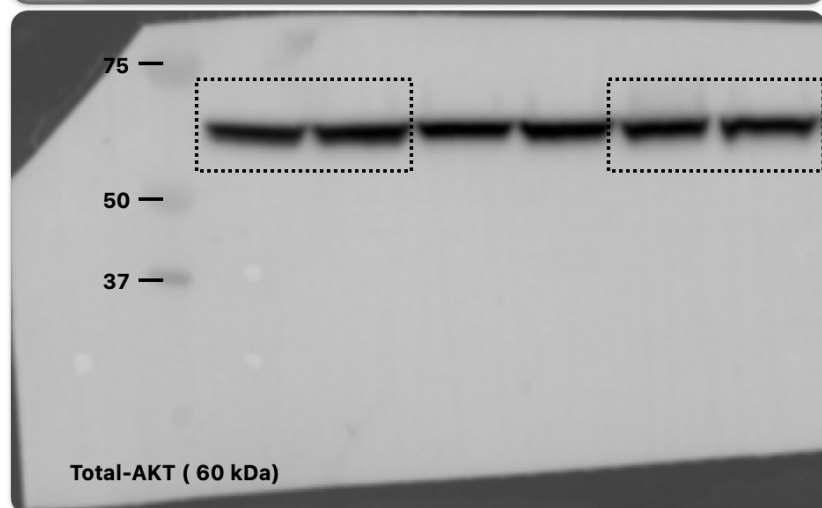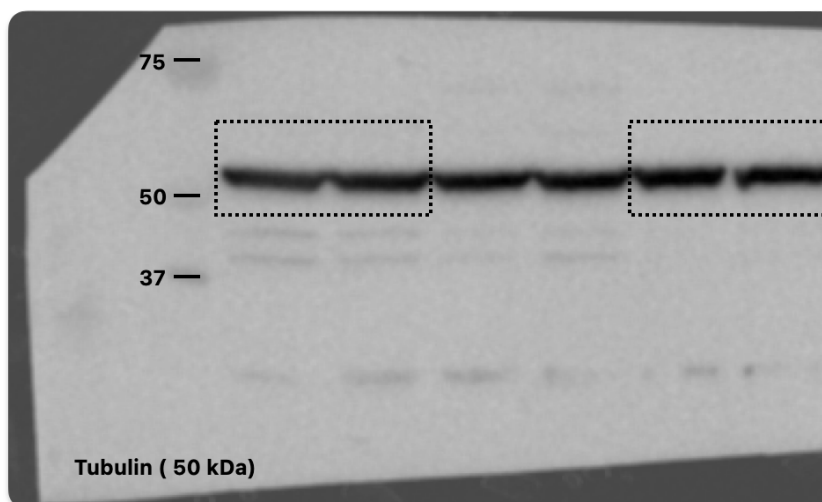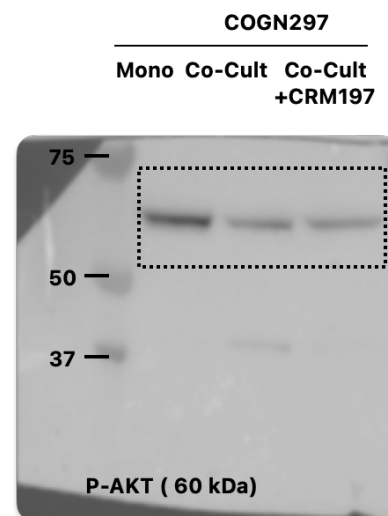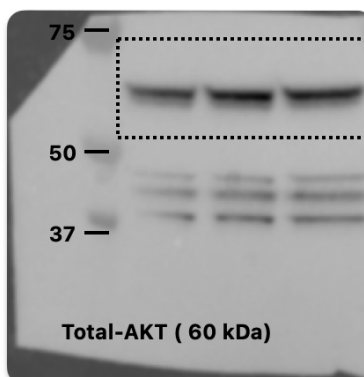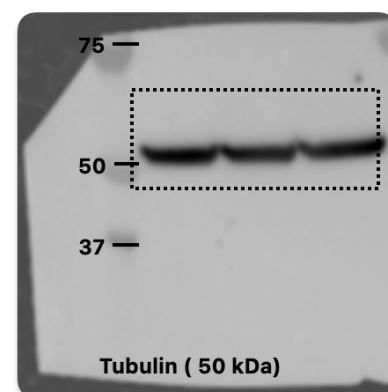

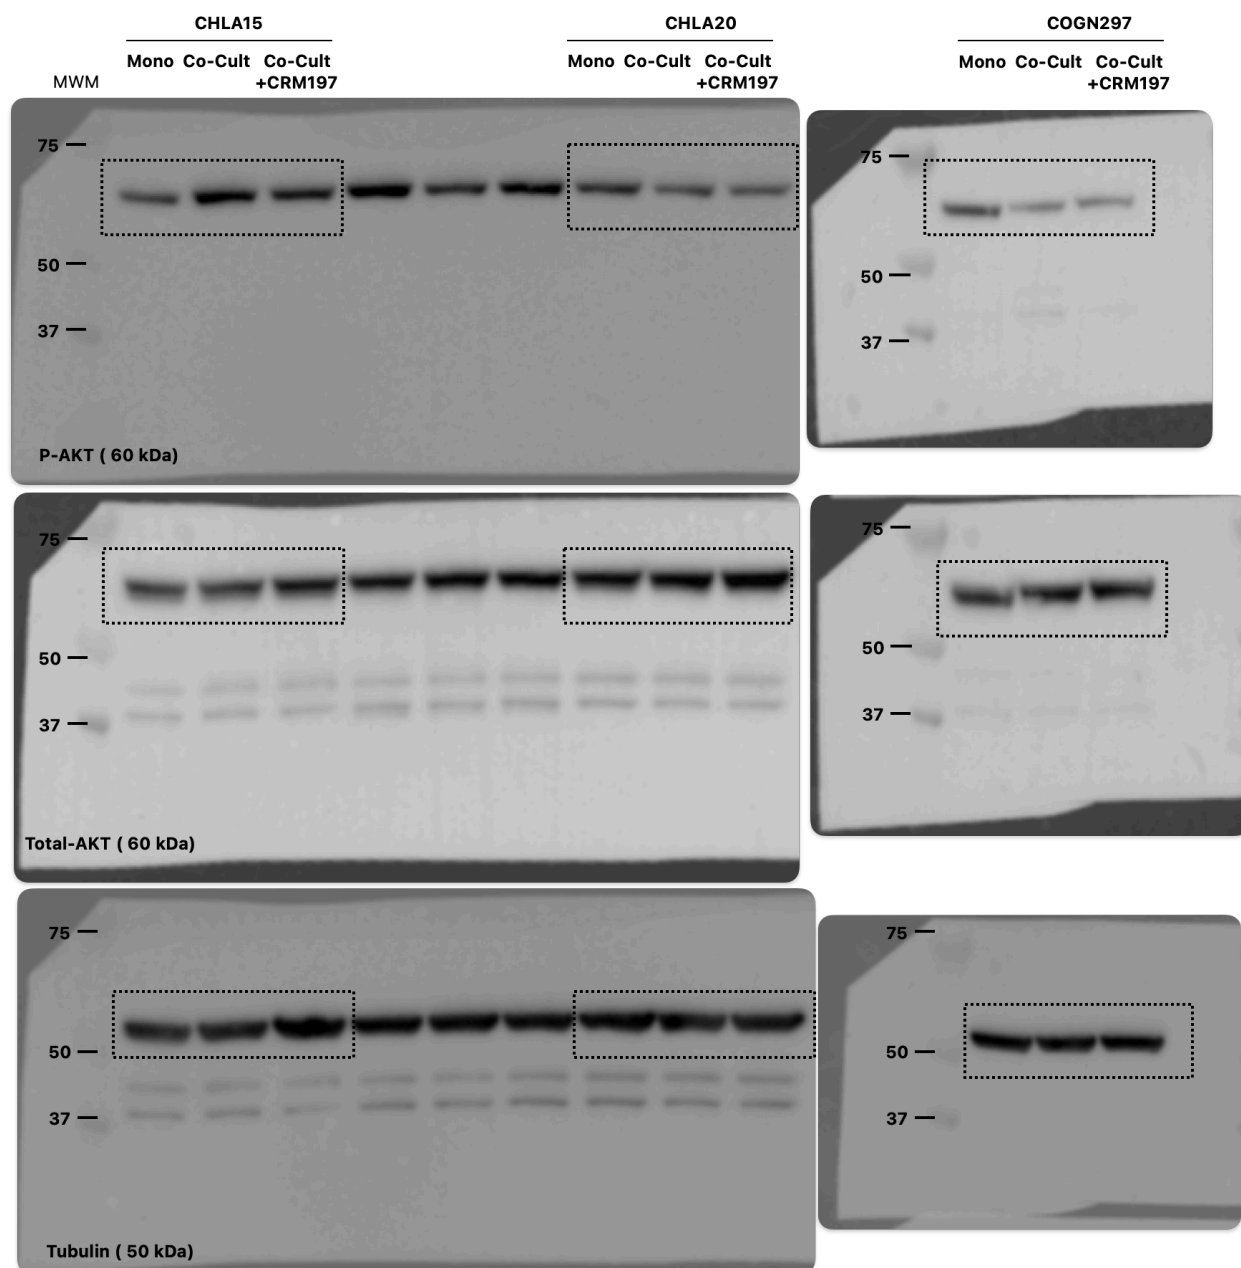

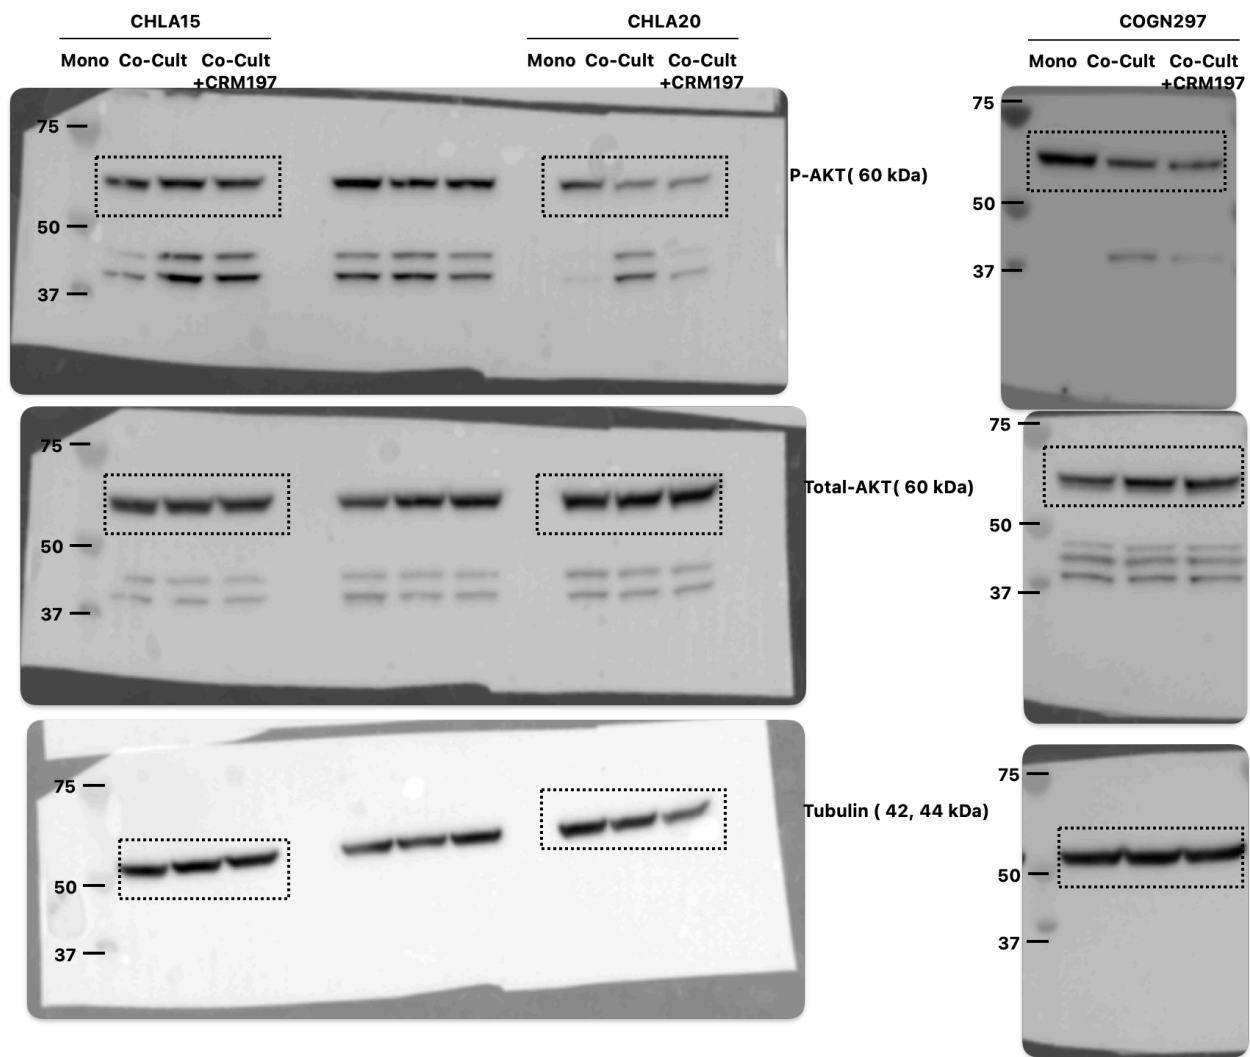

Supplement: MOESM11 [file 41588_2025_2158_MOESM11_ESM.pdf]
